# Supplementary material
Source: PubMed Central journal article supplement (PMC3347686)

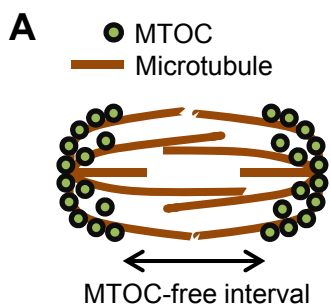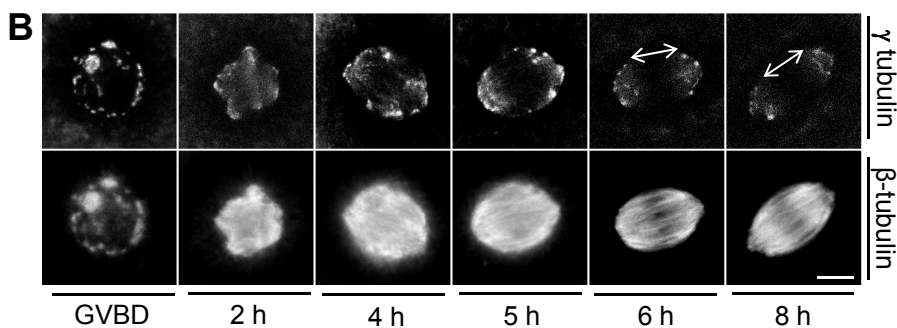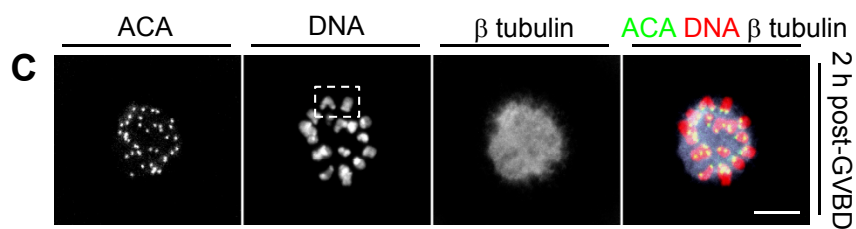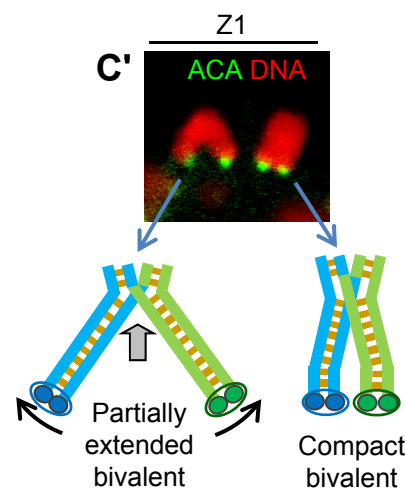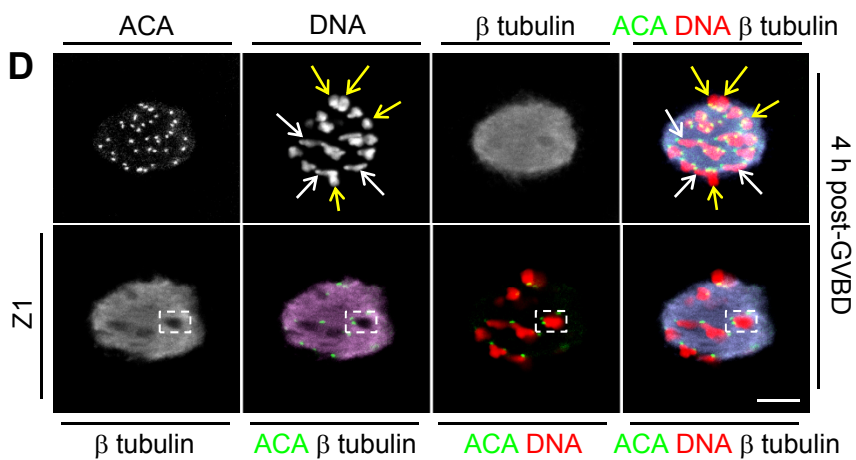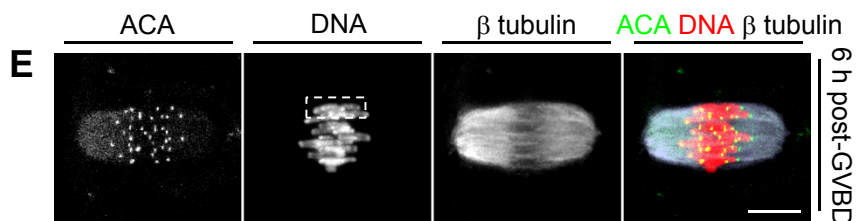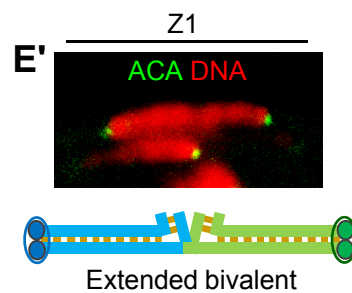

Supplement: supp_dev.078352_DEV078352FigS1.pdf [file supp_dev.078352_DEV078352FigS1.pdf]

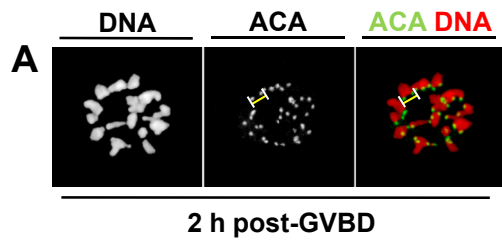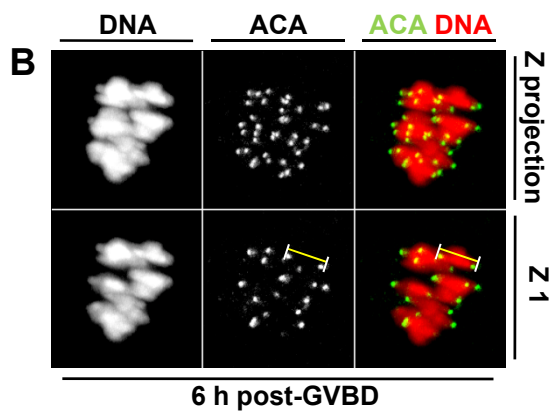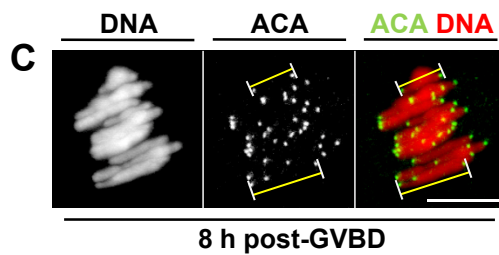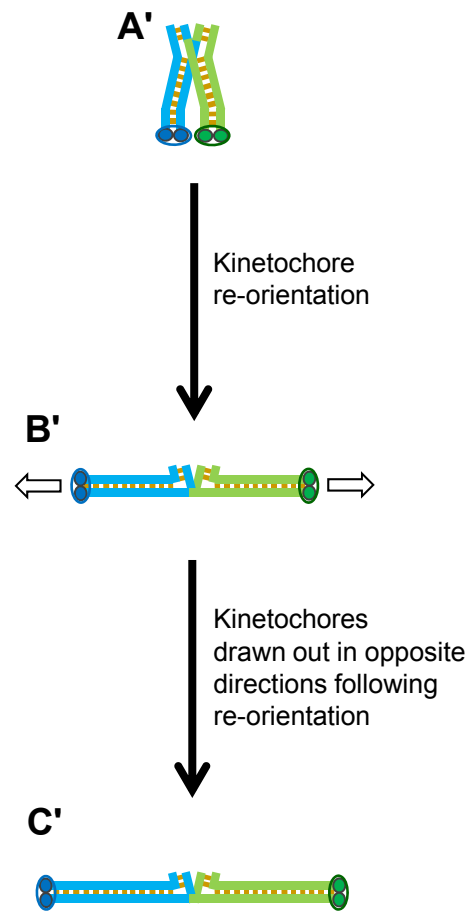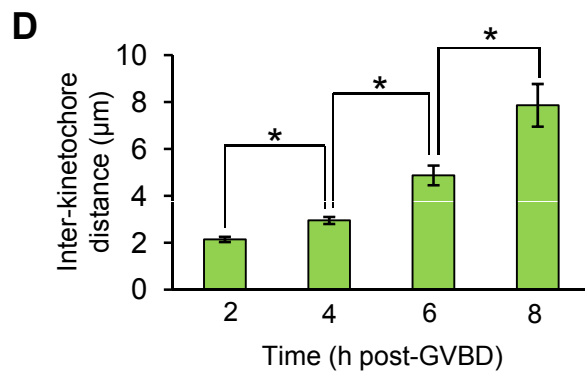

Supplement: supp_dev.078352_DEV078352FigS2.pdf [file supp_dev.078352_DEV078352FigS2.pdf]

**A**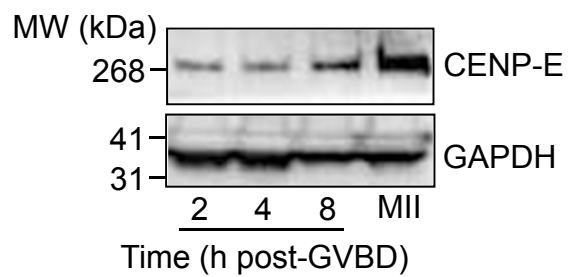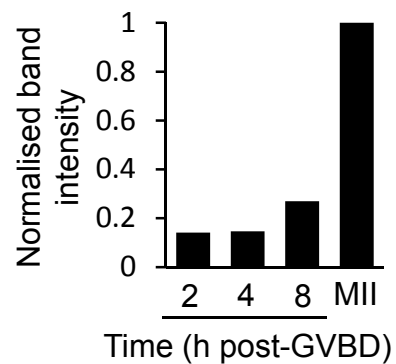**B**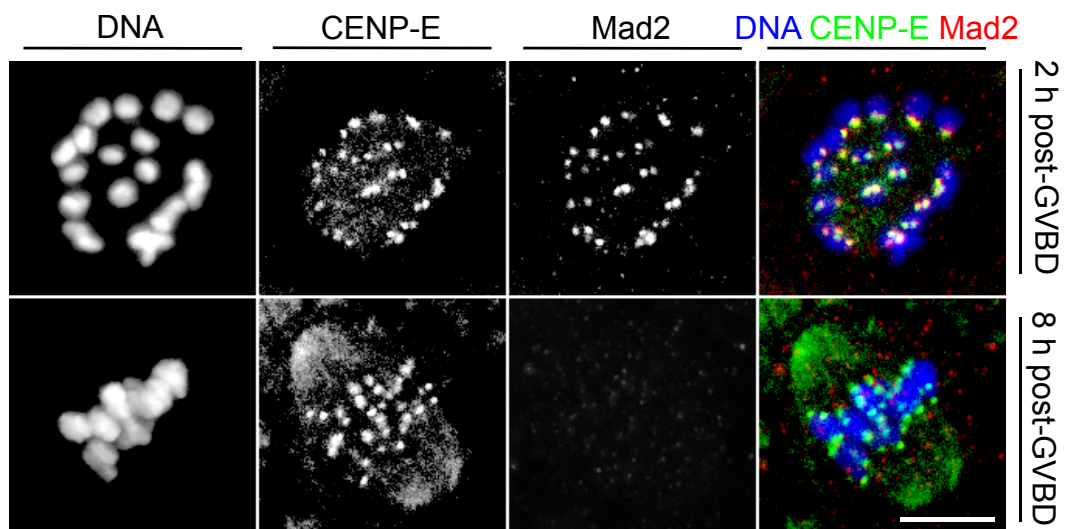**C**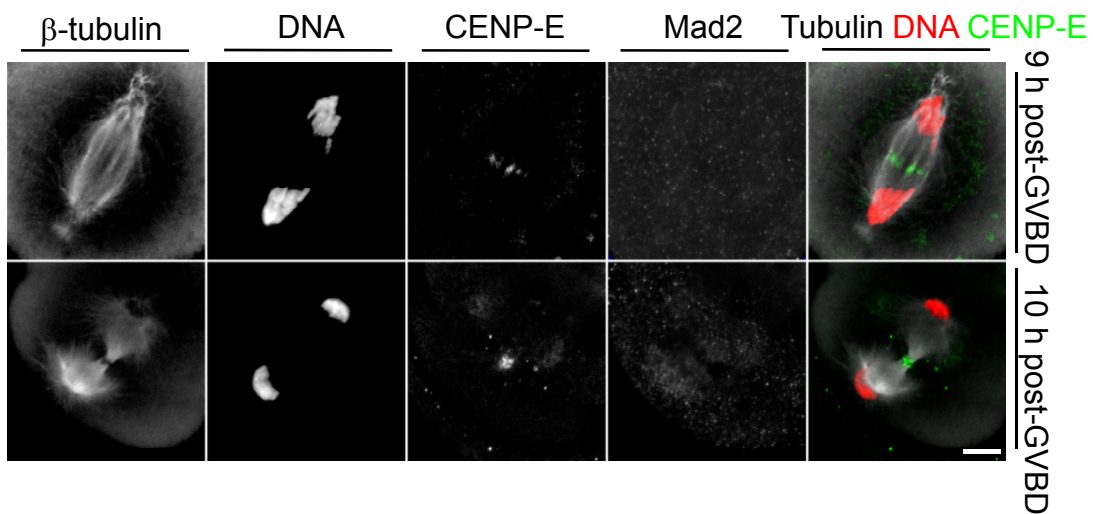

Supplement: supp_dev.078352_DEV078352FigS3.pdf [file supp_dev.078352_DEV078352FigS3.pdf]

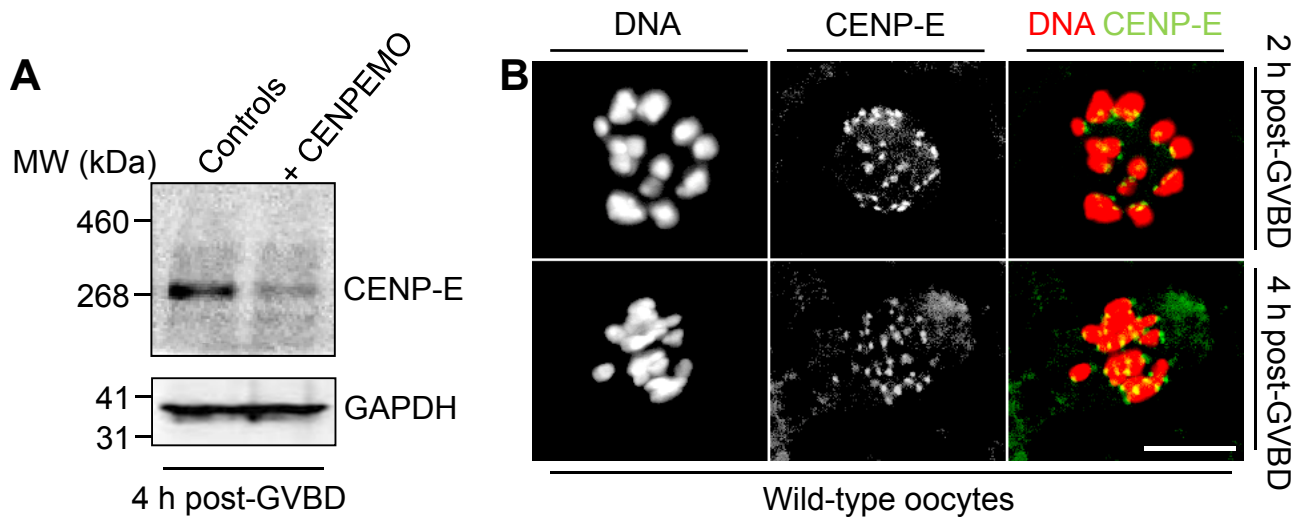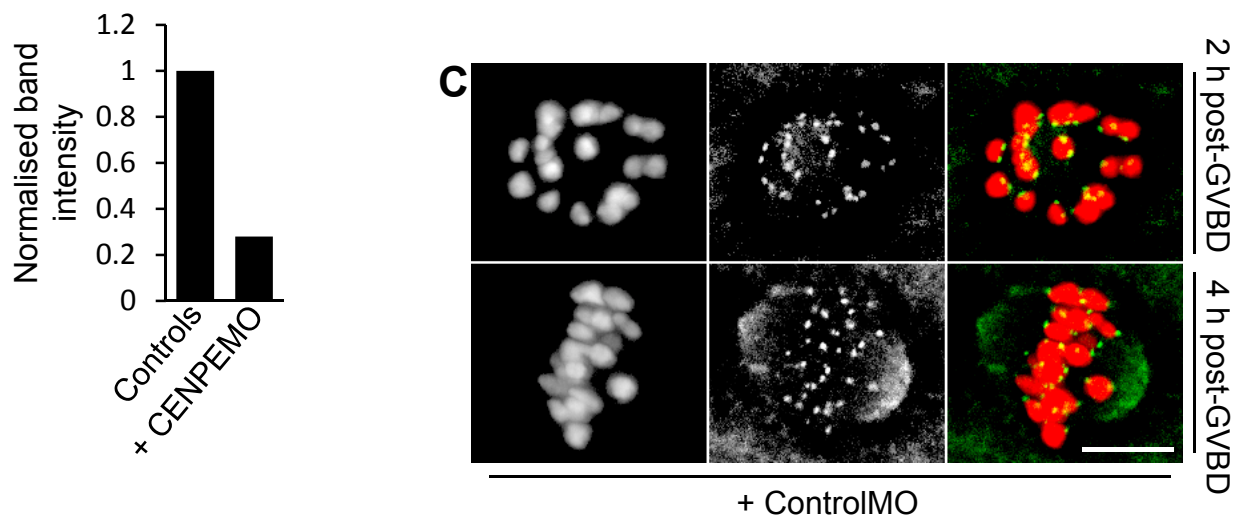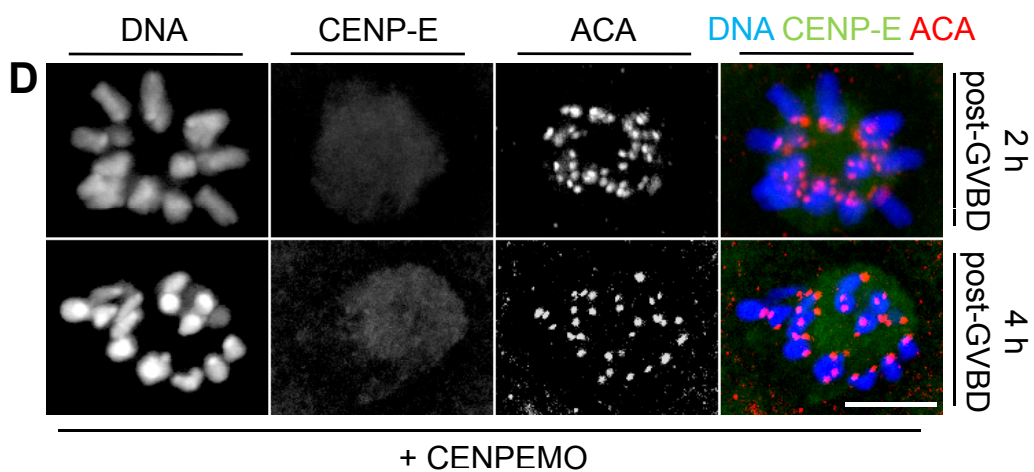

Supplement: supp_dev.078352_DEV078352FigS4.pdf [file supp_dev.078352_DEV078352FigS4.pdf]
